# Supplementary material for: Efficient conversion of lactic acid to alanine over noble metal supported on Ni@C catalysts
Source: Royal Society of Chemistry journal article supplement (doi:10.1039/d2ra02514k), 2022-01-01
Supplement: d2ra02514k1.pdf [file d2ra02514k1.pdf]

## Efficient conversion of lactic acid to alanine over noble metal supported on Ni@C catalysts

Haosheng Xin<sup>a,b,c,d</sup>, Zhongxun Xiu<sup>a,b,c</sup>, Shijun Liu<sup>a</sup>, Haiyong Wang<sup>a,b,c</sup>, Chenguang Wang<sup>a,b,c</sup>,  
Longlong Ma<sup>b,c</sup>, Qiying Liu<sup>a,b,c\*</sup>

<sup>a</sup> Guangzhou Institute of Energy Conversion, Chinese Academy of Sciences, Guangzhou 510640,  
P. R. China

<sup>b</sup> CAS Key Laboratory of Renewable Energy, Guangzhou 510640, P. R. China

<sup>c</sup> Guangdong Key Laboratory of New and Renewable Energy Research and Development,  
Guangzhou 510640, P. R. China

<sup>d</sup> University of Chinese Academy of Sciences, Beijing 100049, P. R. China

\*Corresponding authors. Tel: +86-20-37029835; Fax: +86-20-87057637  
Email address: liuqy@ms.giec.ac.cn

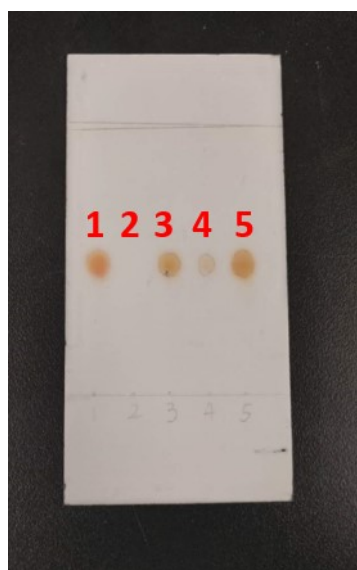

**Figure S1.** The TLC analysis results of different samples. 1-2: the standard sample of Ala and LA;  
3-5: the reaction solution catalyzed by Ru/Ni@C (reactants: 3-LA, 4-glycerol, 5-pyruvate acid).

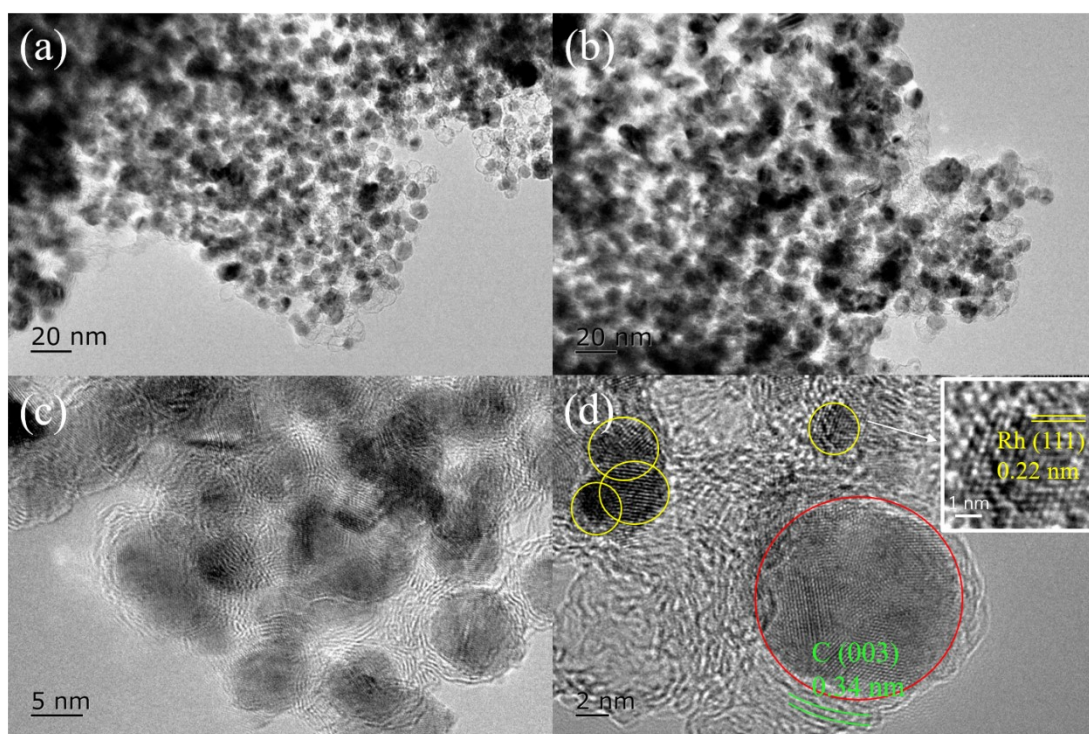

**Figure S2.** The TEM and HRTEM images of Rh/Ni@C.

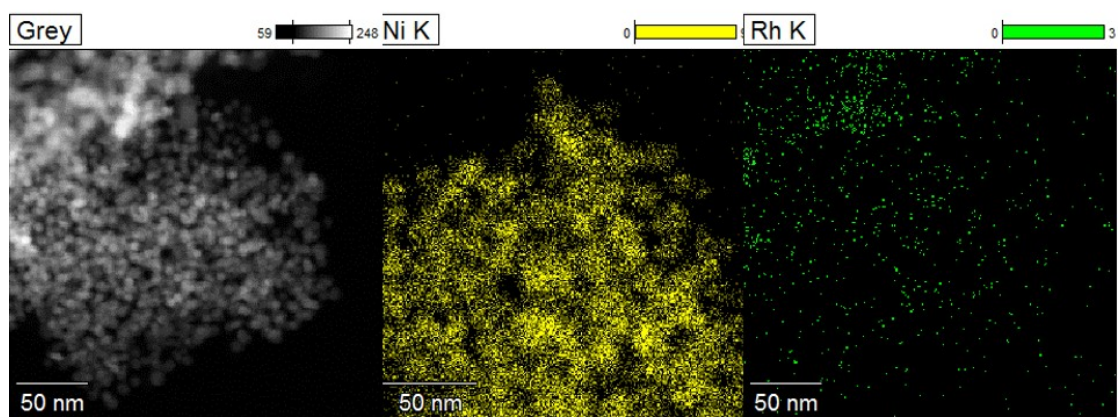

**Figure S3.** The chemical element mapping for the spatial distribution of Ni and Rh of Rh/Ni@C.

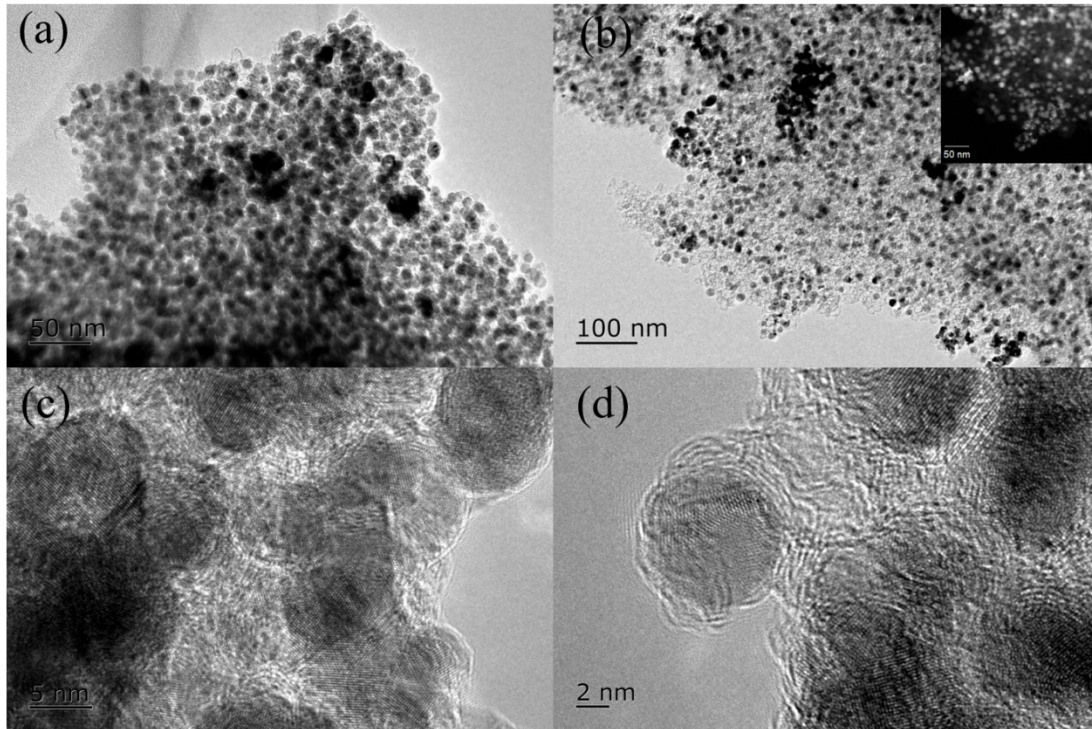

**Figure S4.** The TEM and HRTEM images of Pt/Ni@C.

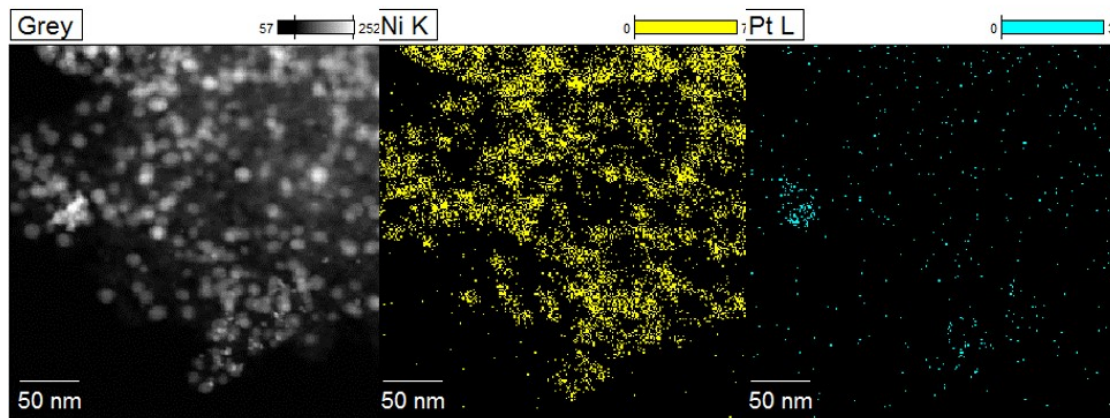

**Figure S5.** The chemical element mapping for the spatial distribution of Ni and Pt of Pt/Ni@C.

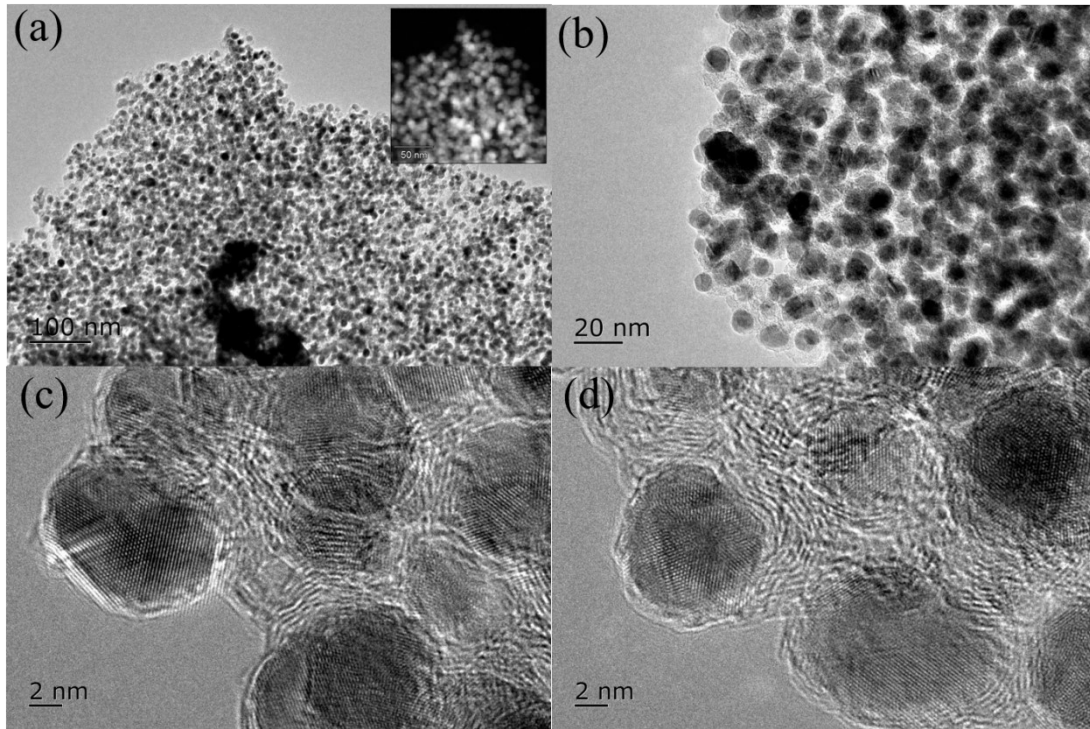

**Figure S6.** The TEM and HRTEM images of Pd/Ni@C.

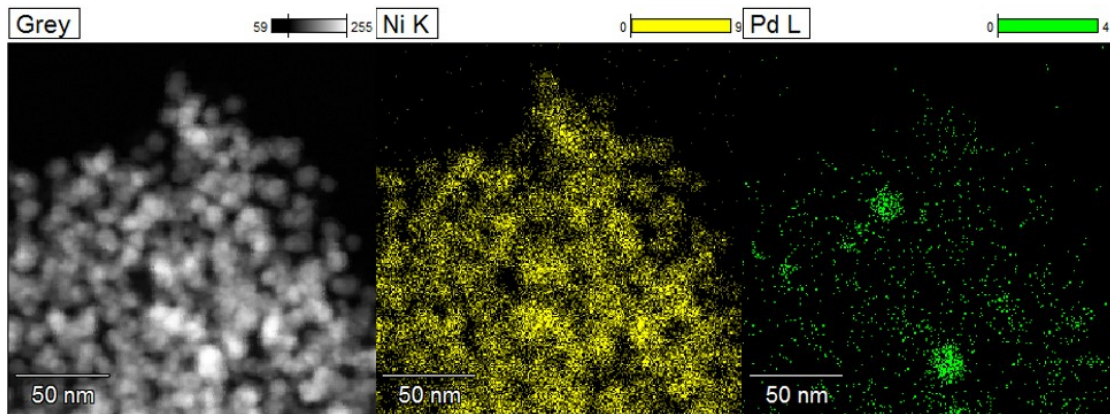

**Figure S7.** The chemical element mapping for the spatial distribution of Ni and Pd of Pd/Ni@C.

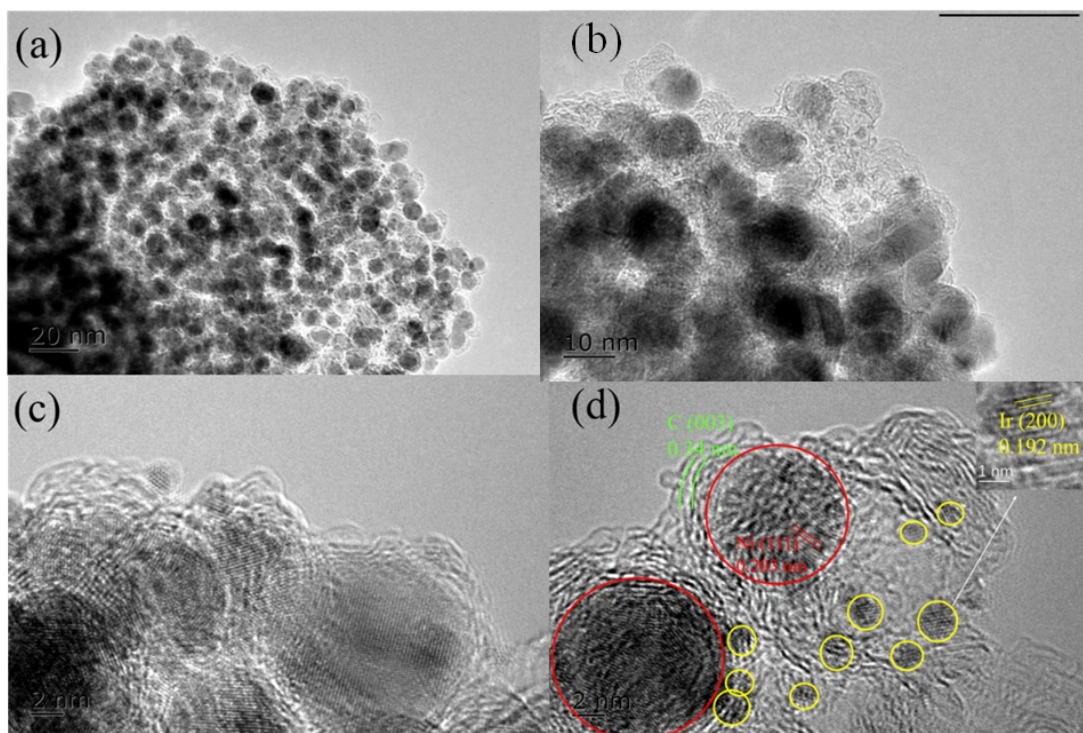

**Figure S8.** The TEM and HRTEM images of Ir/Ni@C.

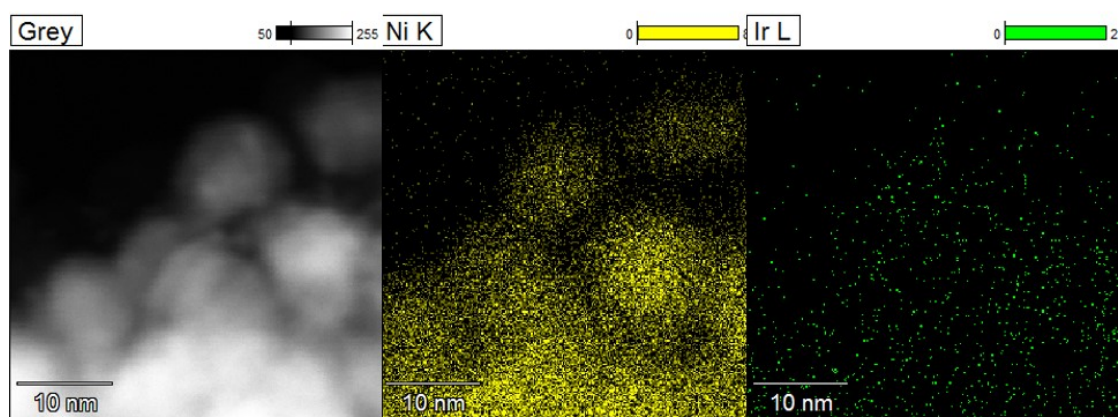

**Figure S9.** The chemical element mapping for the spatial distribution of Ni and Ir of Ir/Ni@C.

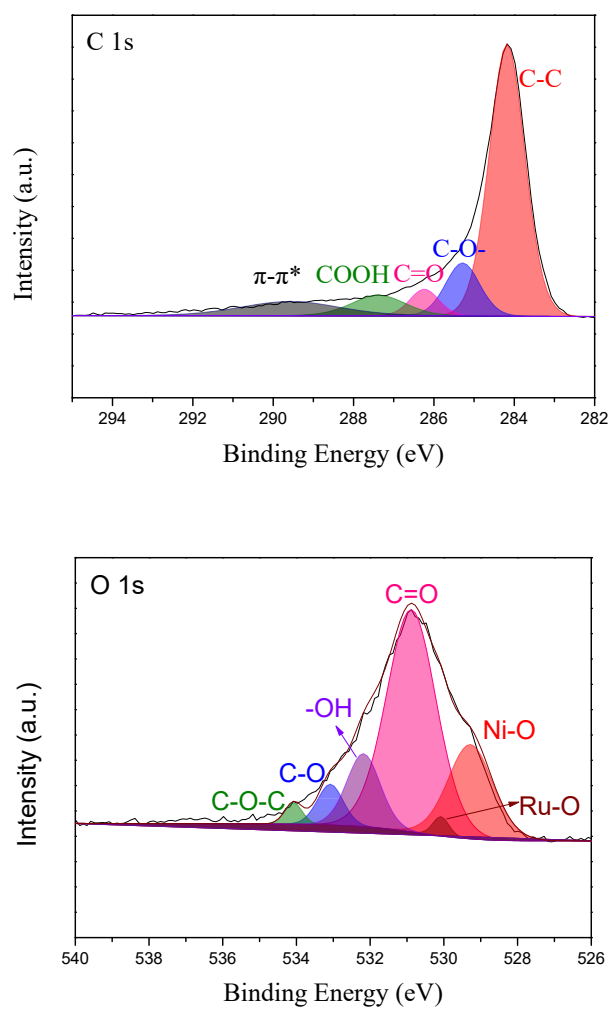

**Figure S10.** C1s and O1s XPS spectra of Ru/Ni@C catalyst.

**Table S1.** The acid amount of catalysts.

| Catalysts               | Ni@C  | CS    | Ru/CS | Ru/Ni@C |
|-------------------------|-------|-------|-------|---------|
| Acid amount<br>(mmol/g) | 0.050 | 0.047 | 0.126 | 0.209   |

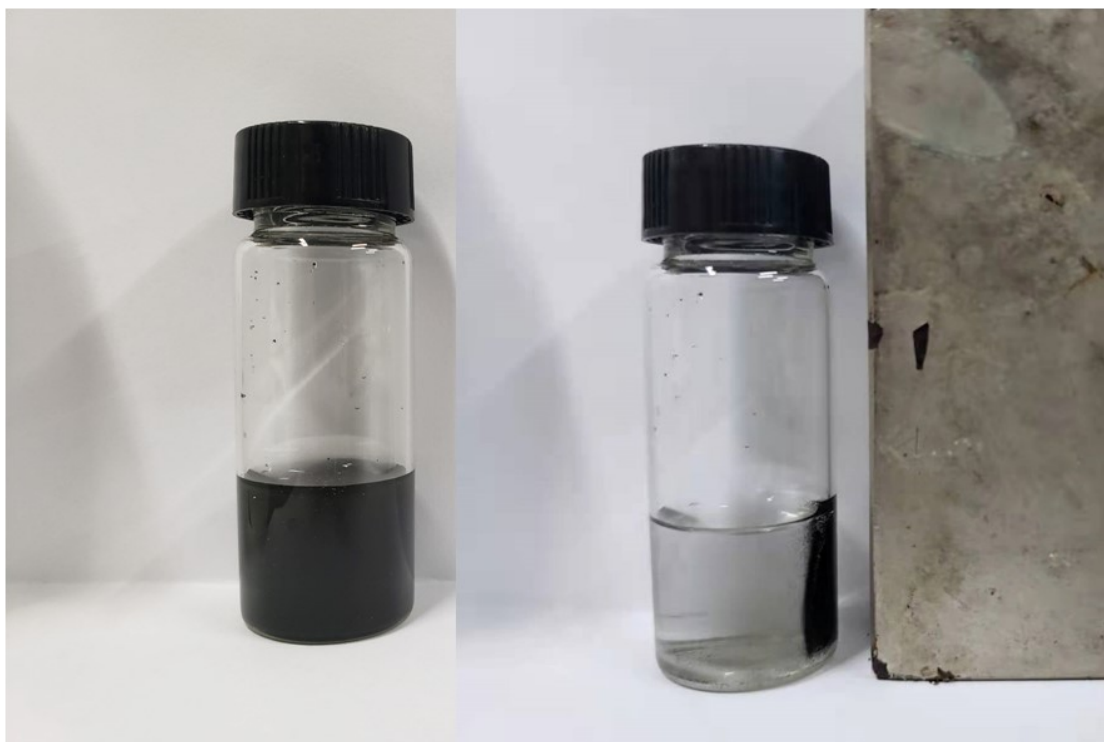

**Figure S11.** Photo images for the magnetic separable property of Ru/Ni@C catalyst.
